# Supplementary material for: Cross‐Sectional Associations of Objectively Measured Sedentary Time, Physical Activity, and Fitness With Cardiac Structure and Function: Findings From the Dallas Heart Study
Source: PubMed Central journal article supplement — J Am Heart Assoc. 2021 Feb 22;10(5):e015601. doi: 10.1161/JAHA.119.015601 (PMC8174255; doi:10.1161/jaha.119.015601), 2021-02-22

# **SUPPLEMENTAL MATERIAL**

**Table S1. Baseline characteristics stratified by quartiles of sedentary time.**

|                                              | Quartiles of sedentary time (minutes) |                      |                     |                    | P value |
|----------------------------------------------|---------------------------------------|----------------------|---------------------|--------------------|---------|
|                                              | Q1<br>N= 314                          | Q2<br>N= 349         | Q3<br>N=375         | Q4<br>N=330        |         |
| Age (years)                                  | 49.0 (9.8)                            | 49.3 (10.1)          | 49.2 (10.6)         | 49.3 (10.1)        | 0.75    |
| Male (%)                                     | 39.1                                  | 41.0                 | 41.1                | 39.7               | 0.90    |
| Race/ethnicity (%)                           |                                       |                      |                     |                    |         |
| White                                        | 38.9                                  | 38.1                 | 37.3                | 38.5               | 0.87    |
| Black                                        | 47.5                                  | 43.8                 | 40.8                | 45.2               | 0.42    |
| Hispanic                                     | 14.3                                  | 15.5                 | 16.9                | 15.2               | 0.66    |
| Education, years                             | 12.3 (2.4)                            | 12.9 (2.1)           | 13.0 (2.3)          | 13.0 (2.0)         | <0.01   |
| Smoking (%)                                  | 19.6                                  | 18.3                 | 19.0                | 22.7               | 0.30    |
| History of HTN (%)                           | 42.0                                  | 40.1                 | 41.3                | 40.3               | 0.76    |
| History of DM (%)                            | 37.9                                  | 44.1                 | 42.1                | 42.1               | 0.42    |
| Family history of CAD (%)                    | 64.0                                  | 67.6                 | 65.3                | 67.9               | 0.46    |
| <b>Cardiometabolic parameters</b>            |                                       |                      |                     |                    |         |
| Systolic BP, mm Hg                           | 130.1 (17.2)                          | 130.1 (18.5)         | 130.0 (18.7)        | 127.8 (15.7)       | 0.14    |
| Hs-CRP                                       | 3.6 (5.2)                             | 3.7 (7.2)            | 4.7 (10.0)          | 6.6 (41.0)         | 0.12    |
| LDL, mg/dL                                   | 119.4 (37.5)                          | 117.3 (35.5)         | 120.3 (33.9)        | 116.3 (33.6)       | 0.63    |
| HDL, mg/dL                                   | 55.0 (16.5)                           | 54.3 (15.2)          | 54.3 (16.2)         | 52.2 (14.4)        | 0.08    |
| TG, mg/dL                                    | 118.2 (74.6)                          | 119.0 (87.7)         | 117.4 (76.9)        | 133.2 (115.7)      | 0.03    |
| Glucose, mg/dL                               | 99.2 (34.9)                           | 97.2 (26.1)          | 98.5 (31.4)         | 101.6 (35.3)       | 0.55    |
| Hemoglobin A1c, %                            | 5.6 (1.0)                             | 5.6 (1.0)            | 5.6 (1.1)           | 5.7 (1.0)          | 0.08    |
| HOMA- IR                                     | 3.3 (3.0)                             | 3.6 (3.6)            | 3.6 (3.3)           | 3.9 (3.6)          | <0.01   |
| BMI, kg/m <sup>2</sup>                       | 29.0 (5.3)                            | 29.0 (5.5)           | 29.4 (5.5)          | 29.4 (5.5)         | 0.22    |
| Whole body fat, %                            | 36.2 (9.0)                            | 36.5 (8.5)           | 36.8 (8.6)          | 36.9 (8.9)         | 0.42    |
| Waist circumference, cm                      | 92.4 (12.4)                           | 93.0 (13.1)          | 93.5 (13.0)         | 94.0 (12.7)        | 0.13    |
| <b>Sedentary time and fitness parameters</b> |                                       |                      |                     |                    |         |
| Sedentary time, min/day                      | 180.9 (45.1)                          | 258.6 (43.3)         | 319.4 (45.1)        | 413.1 (63.1)       | <0.01   |
| Moderate physical activity, min/day          | 57.4 (38.1, 94.3)                     | 37.5 (24.3, 58.7)    | 28.1 (16.7, 43.0)   | 15.7 (7.9, 27.8)   | <0.01   |
| Moderate physical activity, MET-min/day      | 258.2 (171.6, 424.1)                  | 168.8 (109.1, 264.2) | 126.6 (75.2, 193.5) | 70.7 (35.4, 124.9) | <0.01   |
| Vigorous physical activity, min/day          | 1.0 (0.3, 2.4)                        | 0.8 (0.3, 1.9)       | 0.4 (0.0, 1.4)      | 0.1 (0.0, 0.9)     | <0.01   |
| Vigorous physical activity, MET-min/day      | 9.0 (2.3, 21.9)                       | 6.8 (2.3, 16.7)      | 3.9 (0.0, 12.9)     | 1.3 (0.0, 7.7)     | <0.01   |
| Peak VO <sub>2</sub> , ml/kg/min             | 29.1 (10.6)                           | 28.8 (10.0)          | 28.4 (10.4)         | 27.8 (9.7)         | 0.11    |
| <b>Cardiac MRI Parameters</b>                |                                       |                      |                     |                    |         |
| Stroke volume, mL                            | 81.4 (16.6)                           | 81.3 (16.1)          | 80.5 (16.8)         | 80.1 (15.4)        | 0.30    |

|                                          |             |             |             |             |      |
|------------------------------------------|-------------|-------------|-------------|-------------|------|
| LA maximum volume, mL                    | 62.4 (21.2) | 63.3 (22.3) | 60.6 (21.5) | 62.9 (20.9) | 0.90 |
| Peak systolic strain, sec <sup>-1</sup>  | -14.5 (2.8) | -14.7 (2.6) | -14.7 (2.9) | -14.6 (2.8) | 0.65 |
| Effective arterial elastance, mmHg/mL    | 1.52 (0.4)  | 1.52 (0.4)  | 1.54 (0.4)  | 1.51 (0.32) | 0.72 |
| LV mass indexed to BSA, g/m <sup>2</sup> | 64.4 (14.0) | 64.1 (13.8) | 64.2 (14.2) | 63.3 (15.8) | 0.15 |
| LVEDV indexed to BSA, mL/m <sup>2</sup>  | 61.7 (12.2) | 61.1 (10.8) | 59.6 (11.1) | 60.2 (10.7) | 0.05 |

Data presented as mean (standard deviation) for continuous variables (except physical activity parameters which are reported as median (interquartile range), and proportions for categorical variables

: BP: Blood pressure; HTN: Hypertension; DM: diabetes mellitus; hs-CRP: High sensitivity C- reactive protein; LDL-C: Low density lipoprotein; HDL: High density lipoprotein; TG: Triglycerides; HOMA-IR: homeostatic model assessment of insulin resistance; CAD: Coronary artery disease; BMI: Body mass index; Peak VO<sub>2</sub>: Peak oxygen consumption uptake; LV: Left ventricle; BSA: Body surface area; LVEDV: Left ventricular end-diastolic volume; LA: Left atrium

**Table S2. Association between moderate physical activity, vigorous physical activity, sedentary time and CRF with measures of cardiac structure and function (Model 2 + body fat composition).**

| CMR outcome                  | Cardiorespiratory fitness |         | Vigorous physical activity |         | Moderate physical activity |         | Sedentary time           |         |
|------------------------------|---------------------------|---------|----------------------------|---------|----------------------------|---------|--------------------------|---------|
|                              | Std. $\beta$<br>(95% CI)  | P value | Std. $\beta$<br>(95% CI)   | P value | Std. $\beta$<br>(95% CI)   | P value | Std. $\beta$<br>(95% CI) | P value |
| Stroke volume                | 0.20<br>(0.14, 0.25)      | <0.01   | 0.06<br>(0.01, 0.11)       | 0.02    | 0.03<br>(-0.03, 0.09)      | 0.31    | -0.004<br>(-0.06, 0.05)  | 0.90    |
| LA maximum volume            | 0.15<br>(0.07, 0.22)      | <0.01   | -0.003<br>(-0.06, 0.06)    | 0.93    | 0.03<br>(-0.05, 0.11)      | 0.41    | -0.03<br>(-0.11, 0.04)   | 0.38    |
| Peak systolic strain         | -0.19<br>(-0.26, -0.11)   | <0.01   | -0.02<br>(-0.08, 0.05)     | 0.57    | 0.03<br>(-0.05, 0.11)      | 0.50    | -0.01<br>(-0.01, 0.07)   | 0.85    |
| Effective arterial elastance | -0.16<br>(-0.21, -0.11)   | <0.01   | -0.04<br>(-0.09, 0.01)     | 0.09    | -0.02<br>(-0.07, 0.04)     | 0.54    | 0.004<br>(-0.05, 0.06)   | 0.89    |
| LV mass indexed to BSA       | 0.08<br>(0.03, 0.12)      | <0.01   | 0.06<br>(0.02, 0.10)       | <0.01   | 0.04<br>(-0.01, 0.09)      | 0.11    | 0.03<br>(-0.02, 0.08)    | 0.24    |
| LVEDV indexed to BSA         | 0.16<br>(0.11, 0.22)      | <0.01   | 0.06<br>(0.01, 0.11)       | 0.01    | 0.05<br>(-0.003, 0.11)     | 0.06    | 0.02<br>(-0.03, 0.07)    | 0.48    |

This model was adjusted for baseline age, sex, race/ethnicity, education level, income, lean body mass, percent fat mass, smoking status, systolic blood pressure, history of diabetes, history of hypertension, blood glucose levels, serum LDL-C, and family history of coronary artery disease, moderate PA, vigorous PA, CRF, and sedentary time levels (all in the same model).

\*Std.  $\beta$  estimate for the association between exposure of interest (CRF, vigorous physical activity, moderate physical activity, sedentary time) and each CMR outcome represents the number of standard deviations the outcome will change per 1 standard deviation higher exposure variable keeping other covariates fixed.

LA: left atrial; LV: left ventricular; BSA: body surface area; LVEDV: left ventricular end-diastolic volume

**Table S3. Sex- stratified associations between moderate physical activity, vigorous physical activity, sedentary time and CRF with measures of cardiac structure and function.**

| Female                       |                           |         |                            |         |                            |         |                          |         |
|------------------------------|---------------------------|---------|----------------------------|---------|----------------------------|---------|--------------------------|---------|
| CMR outcome                  | Cardiorespiratory fitness |         | Vigorous physical activity |         | Moderate physical activity |         | Sedentary time           |         |
|                              | Std. $\beta$<br>(95% CI)  | P value | Std. $\beta$<br>(95% CI)   | P value | Std. $\beta$<br>(95% CI)   | P value | Std. $\beta$<br>(95% CI) | P value |
| Stroke volume                | 0.19<br>(0.13, 0.26)      | <0.01   | 0.06<br>(-0.01, 0.13)      | 0.11    | -0.03<br>(-0.11, 0.06)     | 0.54    | -0.06<br>(-0.13, 0.02)   | 0.13    |
| LA maximum volume            | 0.11<br>(0.03, 0.20)      | 0.01    | -0.02<br>(-0.10, 0.06)     | 0.60    | -0.01<br>(-0.11, 0.09)     | 0.87    | 0.03<br>(-0.06, 0.12)    | 0.47    |
| Peak systolic strain         | -0.14<br>(-0.22, -0.06)   | <0.01   | -0.04<br>(-0.12, 0.04)     | 0.31    | 0.06<br>(-0.04, 0.10)      | 0.23    | 0.03<br>(-0.06, 0.11)    | 0.52    |
| Effective arterial elastance | -0.16<br>(-0.22, -0.10)   | <0.01   | -0.04<br>(-0.10, 0.02)     | 0.15    | 0.04<br>(-0.03, 0.11)      | 0.30    | 0.05<br>(-0.02, 0.11)    | 0.15    |
| LV mass indexed to BSA       | 0.11<br>(0.04, 0.17)      | 0.002   | 0.01<br>(-0.06, 0.08)      | 0.81    | -0.01<br>(-0.09, 0.07)     | 0.78    | -0.01<br>(-0.08, 0.06)   | 0.72    |
| LVEDV indexed to BSA         | 0.19<br>(0.12, 0.26)      | <0.01   | 0.02<br>(-0.05, 0.09)      | 0.50    | 0.01<br>(-0.07, 0.09)      | 0.88    | -0.03<br>(-0.10, 0.05)   | 0.45    |
| Male                         |                           |         |                            |         |                            |         |                          |         |
| CMR outcome                  | Cardiorespiratory fitness |         | Vigorous physical activity |         | Moderate physical activity |         | Sedentary time           |         |
|                              | Std. $\beta$<br>(95% CI)  | P value | Std. $\beta$<br>(95% CI)   | P value | Std. $\beta$<br>(95% CI)   | P value | Std. $\beta$<br>(95% CI) | P value |
| Stroke volume                | 0.34<br>(0.26, 0.44)      | <0.01   | 0.13<br>(0.04, 0.21)       | <0.01   | 0.02<br>(-0.07, 0.12)      | 0.64    | 0.02<br>(-0.07, 0.12)    | 0.67    |
| LA maximum volume            | 0.25<br>(0.15, 0.36)      | <0.01   | 0.02<br>(-0.06, 0.11)      | 0.60    | 0.03<br>(-0.09, 0.14)      | 0.67    | -0.11<br>(-0.22, 0.01)   | 0.06    |
| Peak systolic strain         | -0.15<br>(-0.25, -0.06)   | <0.01   | 0.01<br>(-0.08, 0.10)      | 0.88    | 0.003<br>(-0.11, 0.11)     | 0.95    | 0.003<br>(-0.10, 0.11)   | 0.96    |
| Effective arterial elastance | -0.30<br>(-0.38, -0.21)   | <0.01   | -0.11<br>(-0.18, -0.03)    | 0.01    | -0.03<br>(-0.122, 0.10)    | 0.49    | -0.03<br>(-0.12, 0.06)   | 0.49    |
| LV mass indexed to BSA       | 0.25<br>(0.16, 0.33)      | <0.01   | 0.19<br>(0.12, 0.26)       | <0.01   | -0.002<br>(-0.09, 0.09)    | 0.96    | 0.04<br>(-0.04, 0.13)    | 0.33    |
| LVEDV indexed to BSA         | 0.31<br>(0.22, 0.40)      | <0.01   | 0.14<br>(0.06, 0.22)       | <0.01   | 0.02<br>(-0.08, 0.12)      | 0.69    | 0.01<br>(-0.08, 0.10)    | 0.85    |

This model was adjusted for baseline age, sex, race/ethnicity, education level, income, BMI, smoking status, systolic blood pressure, history of diabetes, history of hypertension, blood glucose levels, serum LDL-C, and family history of coronary artery disease, moderate PA, vigorous PA, CRF, and sedentary time levels (all in the same model).

\*Std.  $\beta$  estimate for the association between exposure of interest (CRF, vigorous physical activity, moderate physical activity, sedentary time) and each CMR outcome represents the number of standard deviations the outcome will change per 1 standard deviation higher exposure variable keeping other covariates fixed.

LA: left atrial; LV: left ventricular; BSA: body surface area; LVEDV: left ventricular end-diastolic volume

**Table S4. Obesity - stratified associations between moderate physical activity, vigorous physical activity, sedentary time and CRF with measures of cardiac structure and function.**

| Obese                        |                           |         |                            |         |                            |         |                          |         |
|------------------------------|---------------------------|---------|----------------------------|---------|----------------------------|---------|--------------------------|---------|
| CMR outcome                  | Cardiorespiratory fitness |         | Vigorous physical activity |         | Moderate physical activity |         | Sedentary time           |         |
|                              | Std. $\beta$<br>(95% CI)  | P value | Std. $\beta$<br>(95% CI)   | P value | Std. $\beta$<br>(95% CI)   | P value | Std. $\beta$<br>(95% CI) | P value |
| Stroke volume                | 0.27<br>(0.18, 0.37)      | <0.01   | 0.04<br>(-0.04, 0.12)      | 0.30    | -0.03<br>(-0.12, 0.08)     | 0.61    | -0.07<br>(-0.16, 0.02)   | 0.15    |
| LA maximum volume            | 0.23<br>(0.12, 0.34)      | <0.01   | -0.03<br>(-0.13, 0.07)     | 0.61    | -0.05<br>(-0.18, 0.07)     | 0.42    | -0.07<br>(-0.18, 0.04)   | 0.22    |
| Peak systolic strain         | -0.13<br>(-0.22, -0.03)   | 0.01    | -0.01<br>(-0.10, 0.08)     | 0.79    | 0.11<br>(0.01, 0.22)       | 0.04    | 0.06<br>(-0.04, 0.16)    | 0.26    |
| Effective arterial elastance | -0.21<br>(-0.29, -0.13)   | <0.01   | 0.01<br>(-0.06, 0.08)      | 0.81    | 0.03<br>(-0.06, 0.11)      | 0.56    | 0.07<br>(-0.01, 0.15)    | 0.08    |
| LV mass indexed to BSA       | 0.11<br>(0.03, 0.18)      | <0.01   | -0.003<br>(-0.07, 0.06)    | 0.91    | 0.03<br>(-0.04, 0.11)      | 0.39    | -0.03<br>(-0.10, 0.04)   | 0.41    |
| LVEDV indexed to BSA         | 0.24<br>(0.15, 0.33)      | <0.01   | 0.04<br>(-0.04, 0.12)      | 0.33    | -0.002<br>(-0.10, 0.09)    | 0.97    | -0.06<br>(-0.14, 0.03)   | 0.22    |
| Non-obese                    |                           |         |                            |         |                            |         |                          |         |
| CMR outcome                  | Cardiorespiratory fitness |         | Vigorous physical activity |         | Moderate physical activity |         | Sedentary time           |         |
|                              | Std. $\beta$<br>(95% CI)  | P value | Std. $\beta$<br>(95% CI)   | P value | Std. $\beta$<br>(95% CI)   | P value | Std. $\beta$<br>(95% CI) | P value |
| Stroke volume                | 0.26<br>(0.19, 0.33)      | <0.01   | 0.11<br>(0.04, 0.17)       | <0.01   | 0.02<br>(-0.06, 0.10)      | 0.61    | 0.01<br>(-0.06, 0.09)    | 0.72    |
| LA maximum volume            | 0.17<br>(0.08, 0.26)      | <0.01   | 0.02<br>(-0.06, 0.09)      | 0.62    | 0.05<br>(-0.05, 0.15)      | 0.29    | 0.01<br>(-0.09, 0.10)    | 0.89    |
| Peak systolic strain         | -0.16<br>(-0.24, -0.08)   | <0.01   | -0.01<br>(-0.08, 0.07)     | 0.83    | -0.03<br>(-0.13, 0.06)     | 0.46    | -0.02<br>(-0.1, 0.07)    | 0.69    |
| Effective arterial elastance | -0.21<br>(-0.27, -0.14)   | <0.01   | -0.10<br>(-0.16, -0.04)    | <0.01   | -0.01<br>(-0.08, 0.06)     | 0.82    | -0.02<br>(-0.09, 0.05)   | 0.56    |
| LV mass indexed to BSA       | 0.17<br>(0.11, 0.23)      | <0.01   | 0.13<br>(0.08, 0.19)       | <0.01   | -0.04<br>(-0.10, 0.03)     | 0.29    | 0.03<br>(-0.03, 0.09)    | 0.32    |
| LVEDV indexed to BSA         | 0.24<br>(0.17, 0.30)      | <0.01   | 0.10<br>(0.04, 0.16)       | <0.01   | 0.02<br>(-0.05, 0.10)      | 0.54    | 0.02<br>(-0.05, 0.09)    | 0.58    |

This model was adjusted for baseline age, sex, race/ethnicity, education level, income, BMI, smoking status, systolic blood pressure, history of diabetes, history of hypertension, blood glucose levels, serum LDL-C, and family history of coronary artery disease, moderate PA, vigorous PA, CRF, and sedentary time levels (all in the same model).

\*Std.  $\beta$  estimate for the association between exposure of interest (CRF, vigorous physical activity, moderate physical activity, sedentary time) and each CMR outcome represents the number of standard deviations the outcome will change per 1 standard deviation higher exposure variable keeping other covariates fixed.

LA: left atrial; LV: left ventricular; BSA: body surface area; LVEDV: left ventricular end-diastolic volume

**Figure S1. Cohort derivation for the study.**

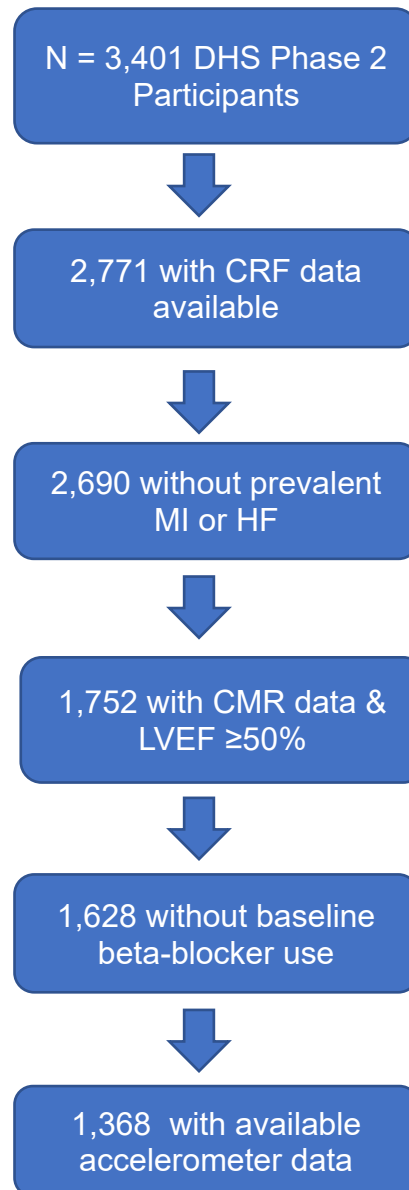

Supplement: JAH3-10-e015601-s001.pdf [file JAH3-10-e015601-s001.pdf]
